# Supplementary material for: Bio-reducible polycations from ring-opening polymerization as potential gene delivery vehicles
Source: Royal Society of Chemistry journal article supplement (doi:10.1039/c6ob00859c), 2016-01-01

## Electronic Supplementary Information

### **Bio-reducible polycations from ring-opening polymerization as potential gene delivery vehicles**

Qing-Ying Yu, Yan-Hong Liu, Zheng Huang, Ji Zhang,\* Chao-Ran Luan, Qin-Fang Zhang and  
Xiao-Qi Yu\*

*Key Laboratory of Green Chemistry and Technology (Ministry of Education), College of Chemistry, Sichuan  
University, Chengdu 610064, PR China*

\*Corresponding authors: xqyu@scu.edu.cn (X.-Q. Yu); jzhang@scu.edu.cn (J. Zhang); Fax: +86-28-  
85415886

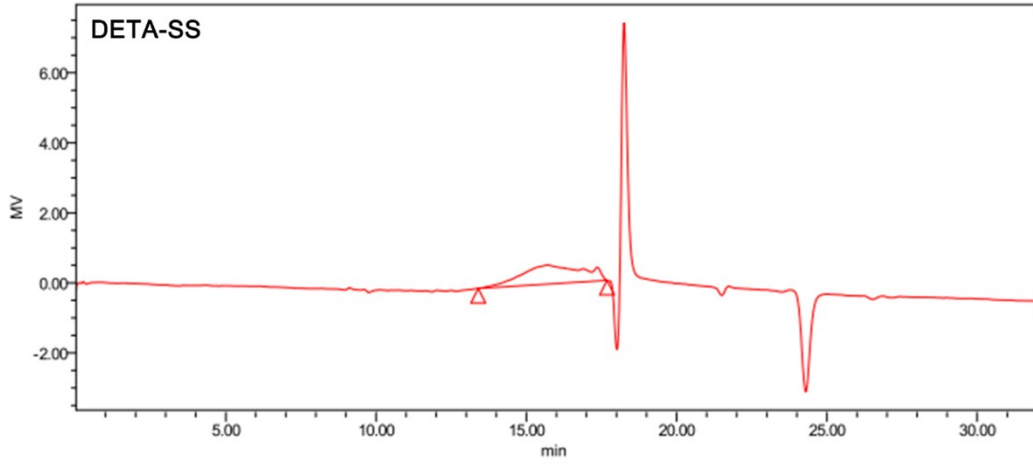

GPC results

|   | Mn (Da) | Mw (Da) | MP   | Mz (Da) | Mz+1 (Da) | Dispersity index | MW 1 (Da) | MW 2 (Da) |
|---|---------|---------|------|---------|-----------|------------------|-----------|-----------|
| 1 | 1397    | 1965    | 1896 | 2651    | 3369      | 1.406362         |           |           |

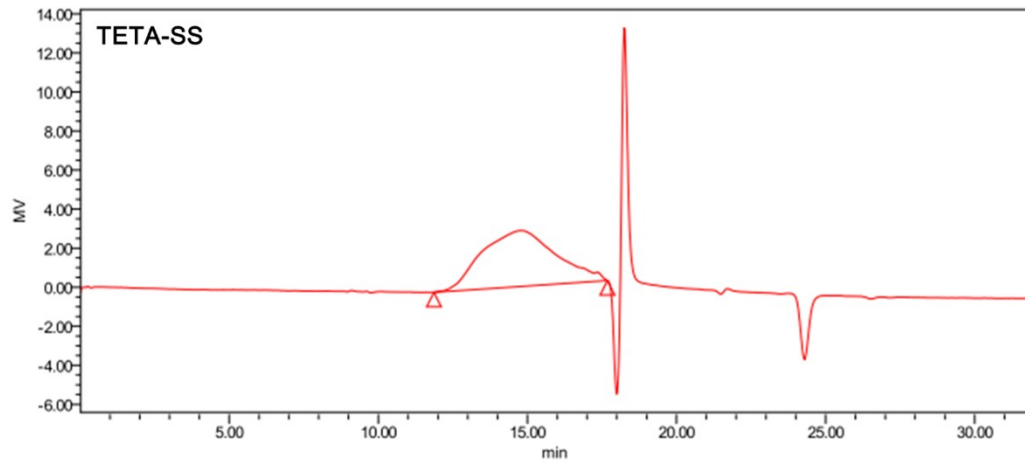

GPC results

|   | Mn (Da) | Mw (Da) | MP   | Mz (Da) | Mz+1 (Da) | Dispersity index | MW 1 (Da) | MW 2 (Da) |
|---|---------|---------|------|---------|-----------|------------------|-----------|-----------|
| 1 | 2582    | 4342    | 3347 | 6857    | 10024     | 1.681554         |           |           |

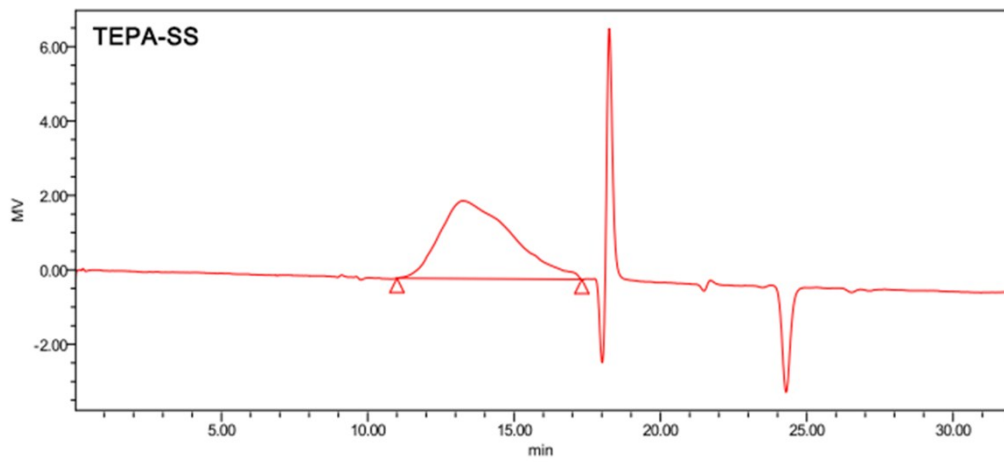

GPC results

|   | Mn (Da) | Mw (Da) | MP   | Mz (Da) | Mz+1 (Da) | Dispersity index | MW 1 (Da) | MW 2 (Da) |
|---|---------|---------|------|---------|-----------|------------------|-----------|-----------|
| 1 | 4380    | 8835    | 9342 | 17167   | 30302     | 2.017424         |           |           |

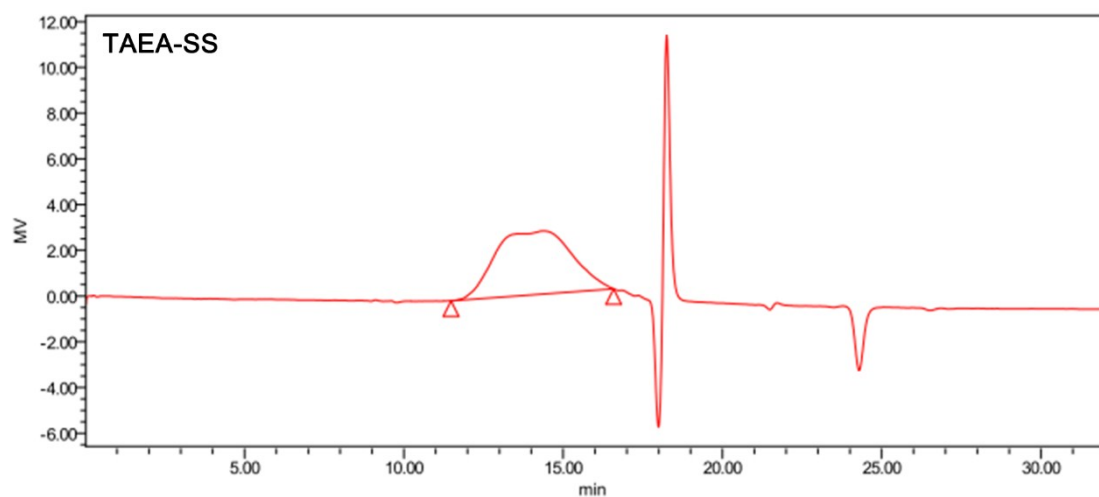

GPC results

|   | Mn (Da) | Mw (Da) | MP   | Mz (Da) | Mz+1 (Da) | Dispersity index | MW 1 (Da) | MW 2 (Da) |
|---|---------|---------|------|---------|-----------|------------------|-----------|-----------|
| 1 | 4385    | 6715    | 4286 | 10372   | 15031     | 1.531552         |           |           |

Fig. S1. GPC data of target polycations.

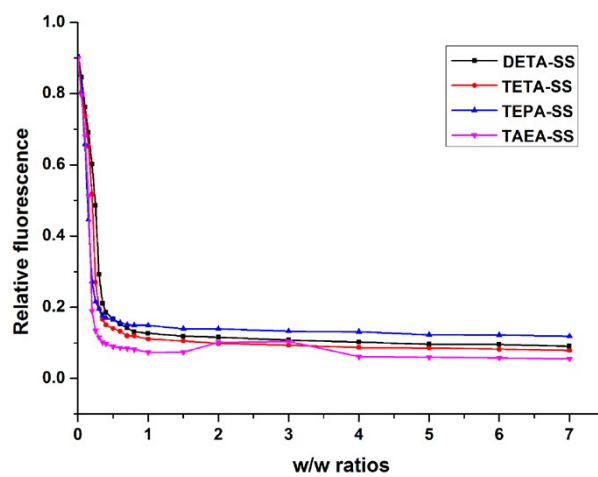

Fig. S2. Fluorescence quenching assay of EB/DNA by addition of polycations.

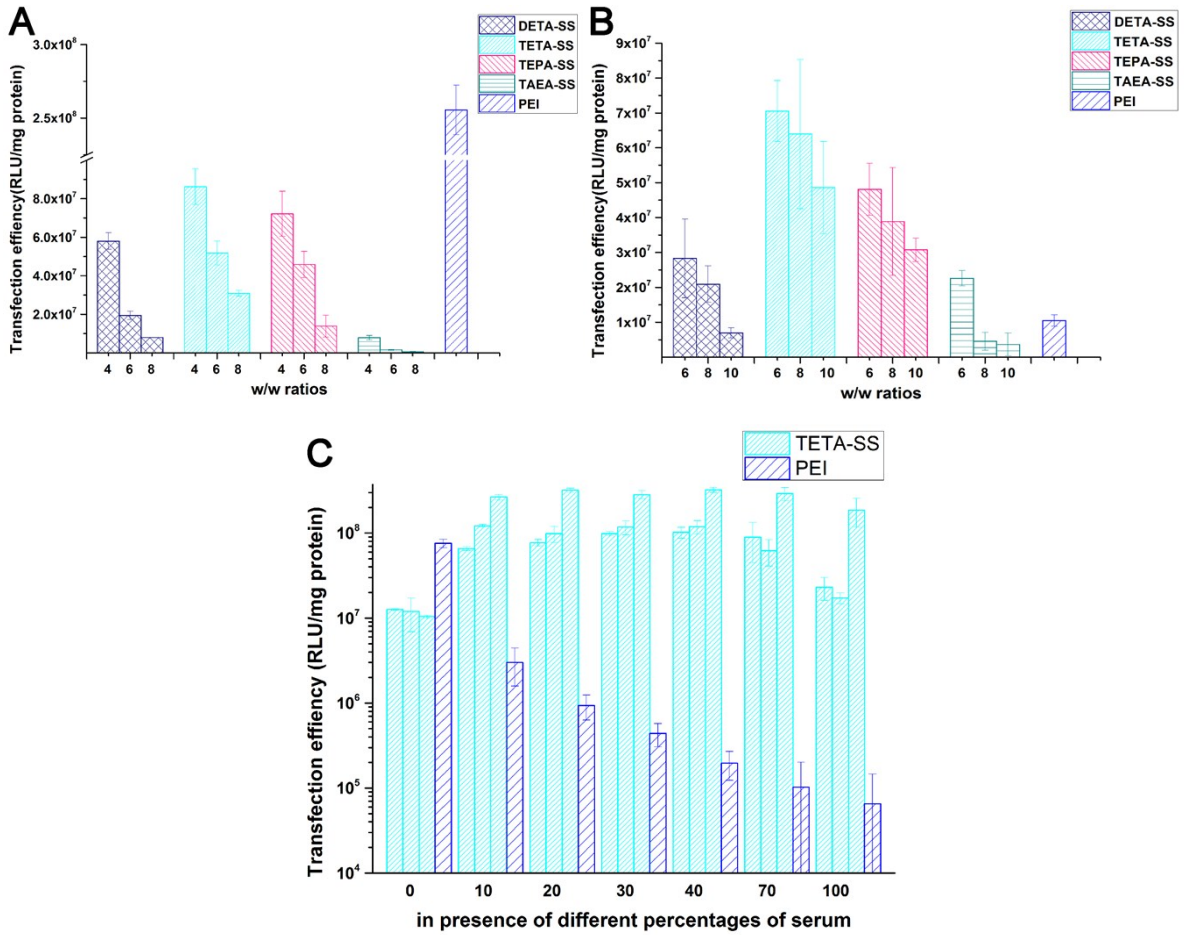

**Fig. S3.** Luciferase gene expression transfected by polyplexes at different weight ratios without (A) and with (B) the presence of 10% serum in comparison with 25 KDa PEI in HEK293 cells. (C) The effect of serum concentration on the TE of **TETA-SS** (weight ratio = 4, 6 and 8) and PEI. The weight ratio for PEI is 1.4. Data represent mean  $\pm$  SD (n=3).

# <sup>1</sup>H NMR spectra

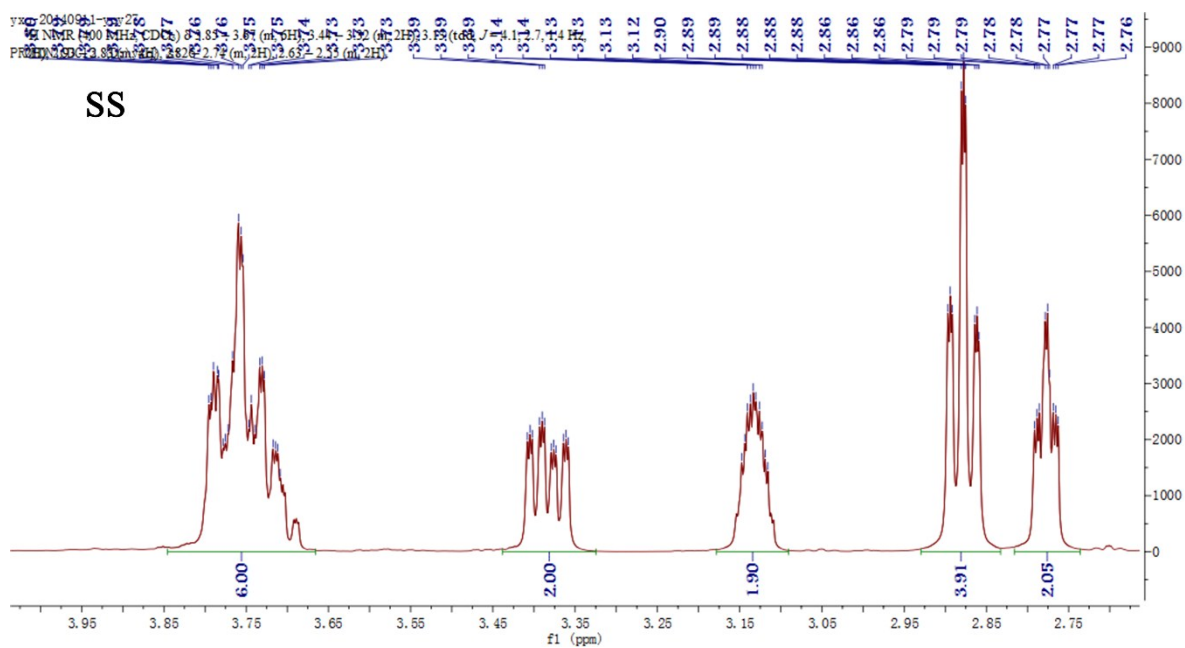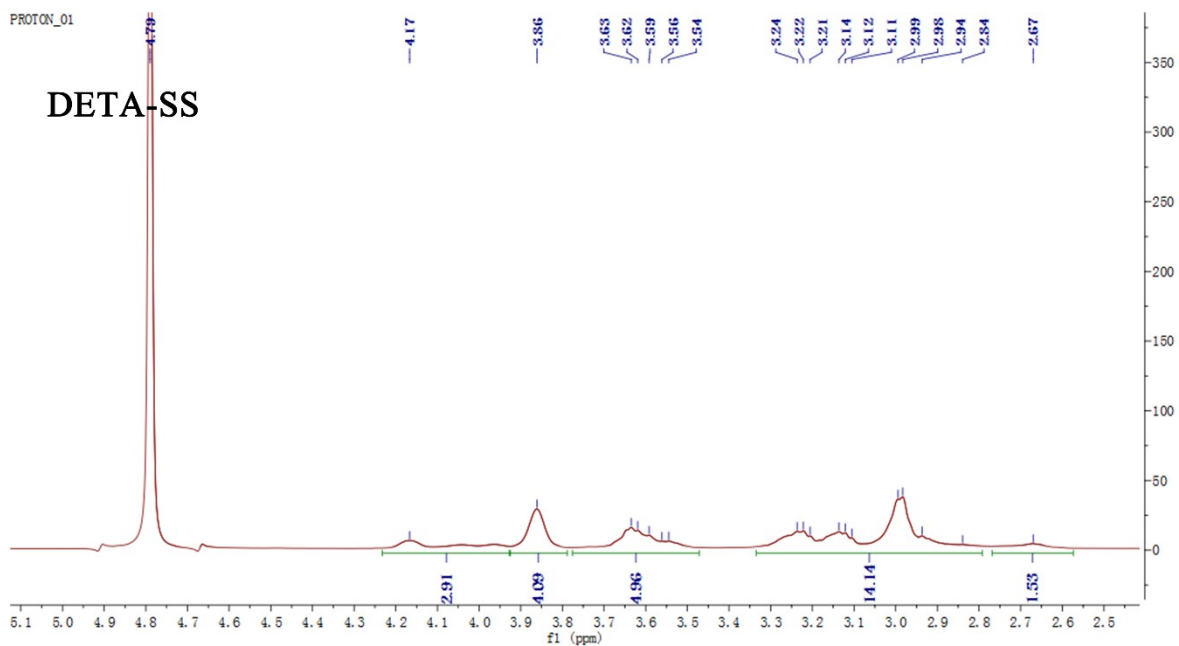

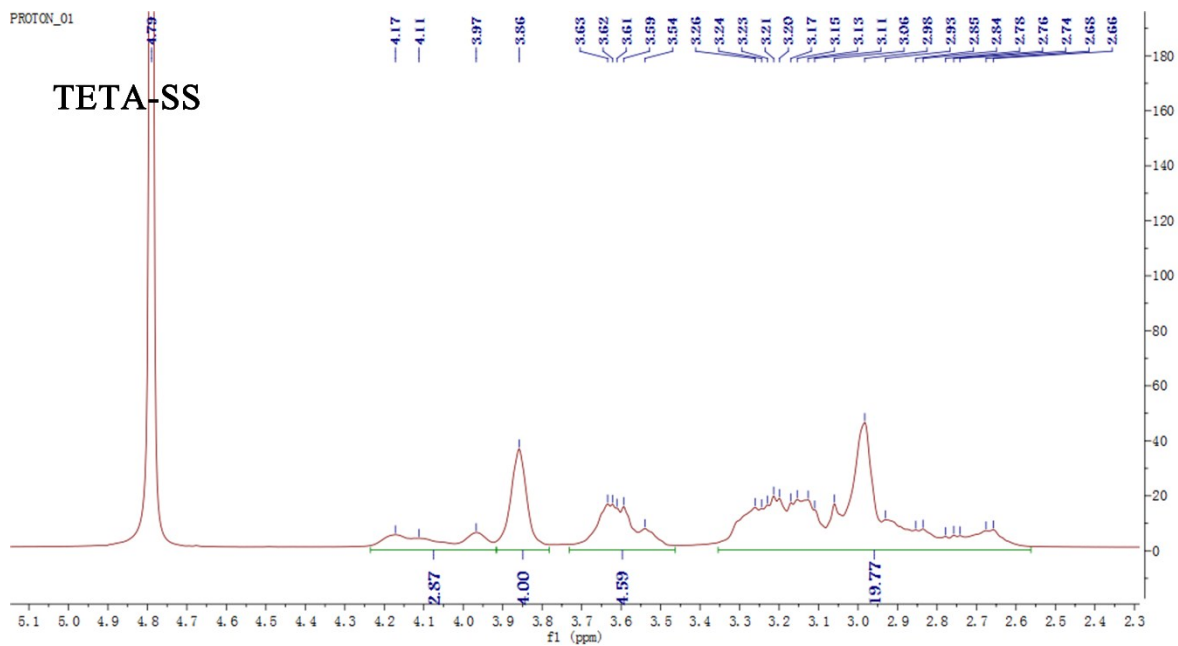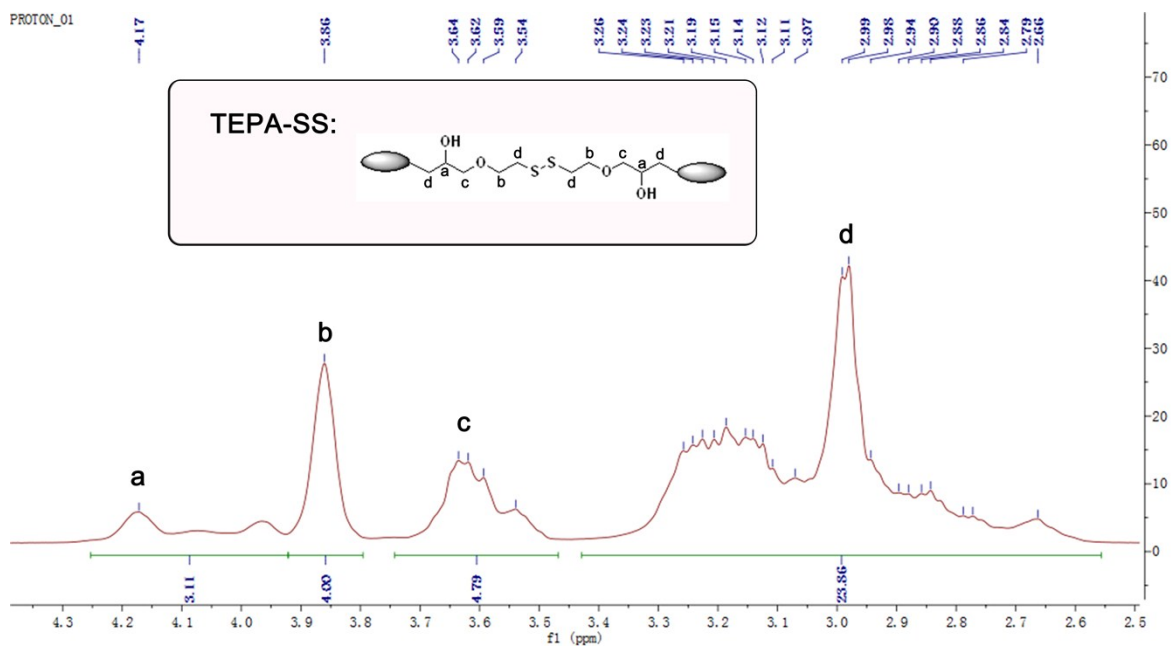

For linear (1 : 1) polycation, theoretical numbers of H: b, 4H; d, 24H (16H on TEPA and 8H on SS).

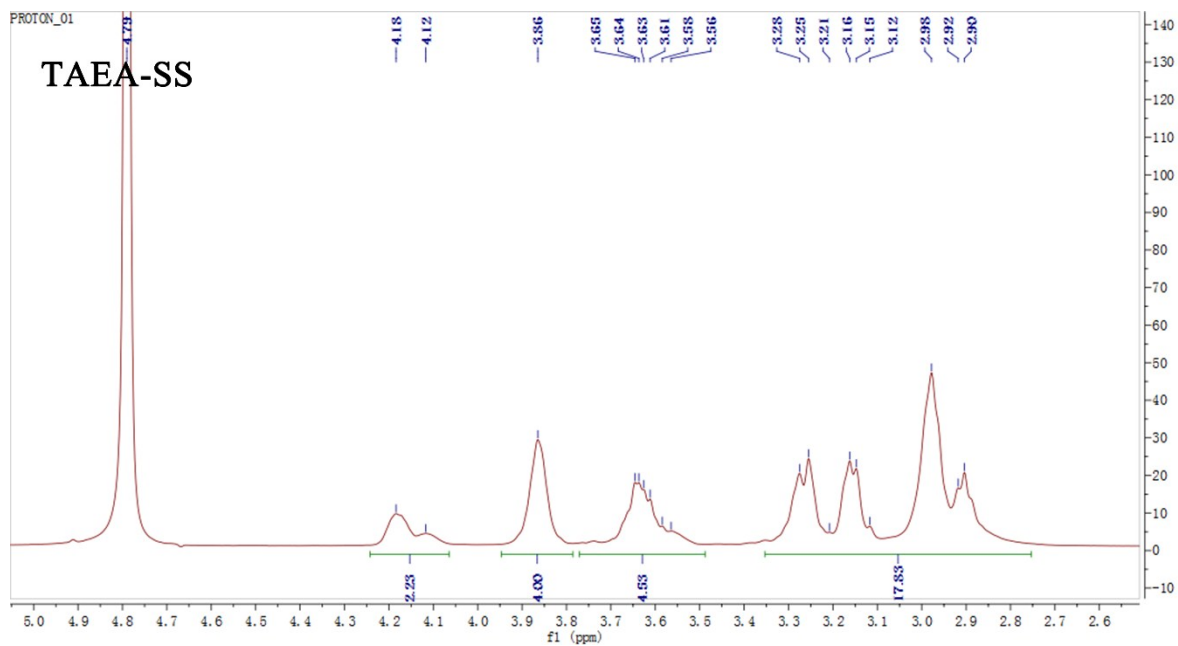

### <sup>13</sup>C NMR spectrum of SS

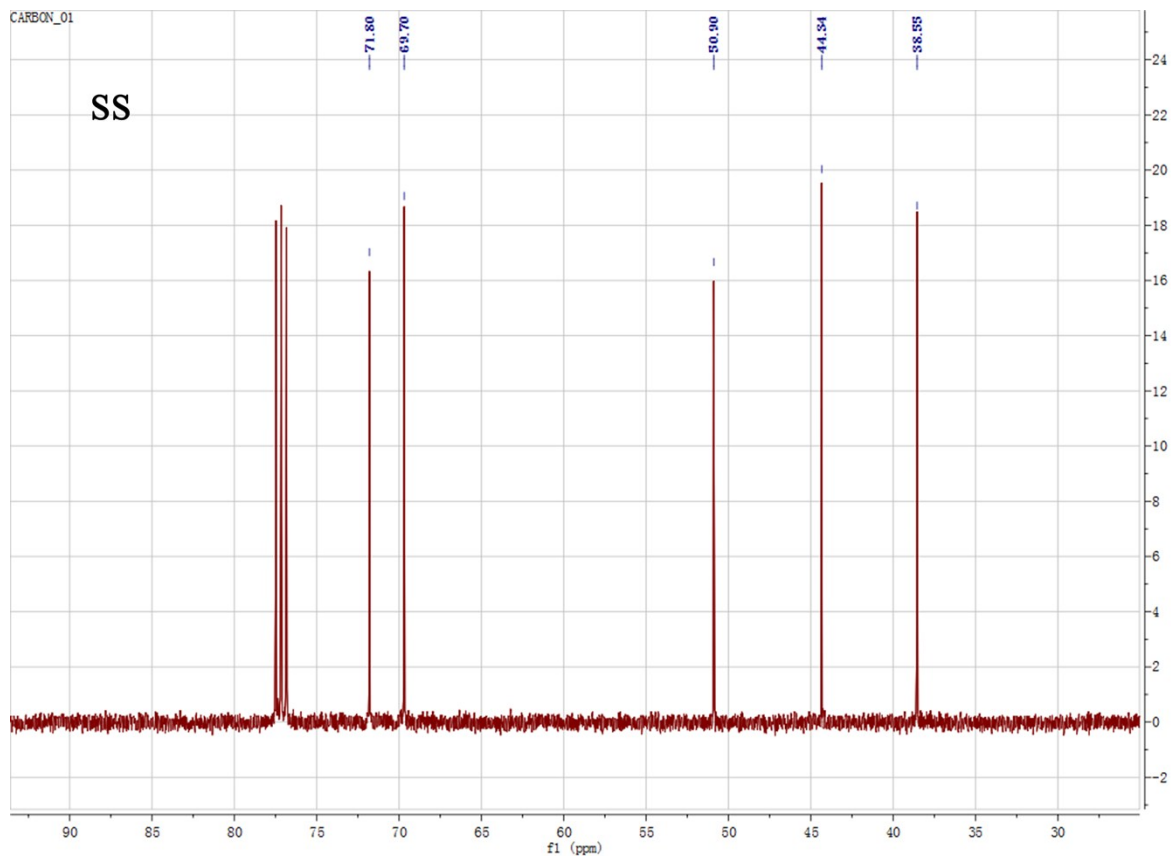

# HR-MS spectrum of SS

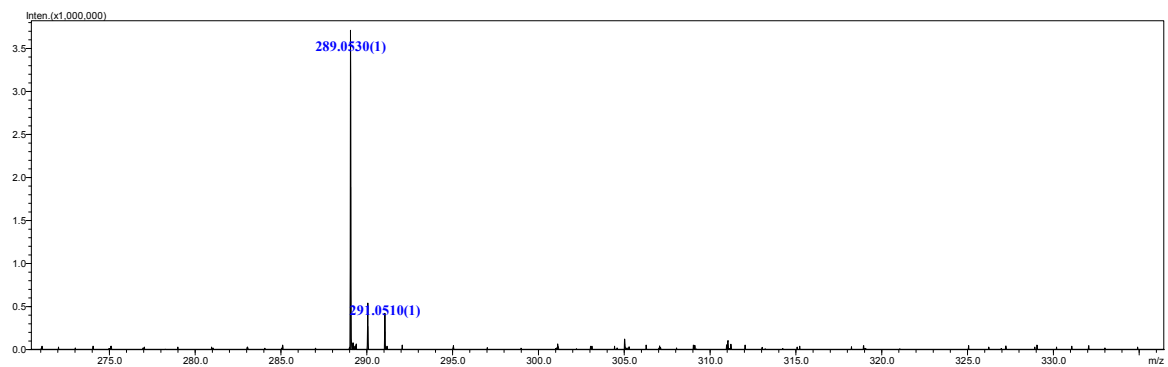

Supplement: c6ob00859c1.pdf [file c6ob00859c1.pdf]
